# Supplementary material for: PI3Kδ/γ inhibitor BR101801 extrinsically potentiates effector CD8+ T cell-dependent antitumor immunity and abscopal effect after local irradiation
Source: PubMed Central journal article supplement — J Immunother Cancer. 2022 Mar 14;10(3):e003762. doi: 10.1136/jitc-2021-003762 (PMC8921929; doi:10.1136/jitc-2021-003762), 2022-03-14
Supplement: jitc-2021-003762supp001.pdf [file jitc-2021-003762supp001.pdf]

## Supplementary Figure 1.

**A**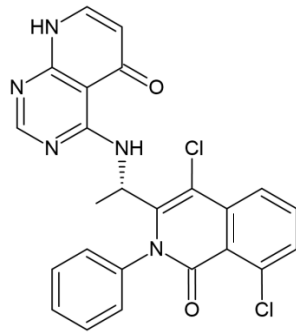**B**

| IC <sub>50</sub> (nM) | Enzymatic potency for PI3K subunits |     |    |   |        |
|-----------------------|-------------------------------------|-----|----|---|--------|
|                       | α                                   | β   | γ  | δ | DNA-PK |
| BR101801              | 106                                 | 171 | 15 | 2 | 6      |

IC<sub>50</sub> = Concentration causing 50% inhibition

## Supplementary Figure 2.

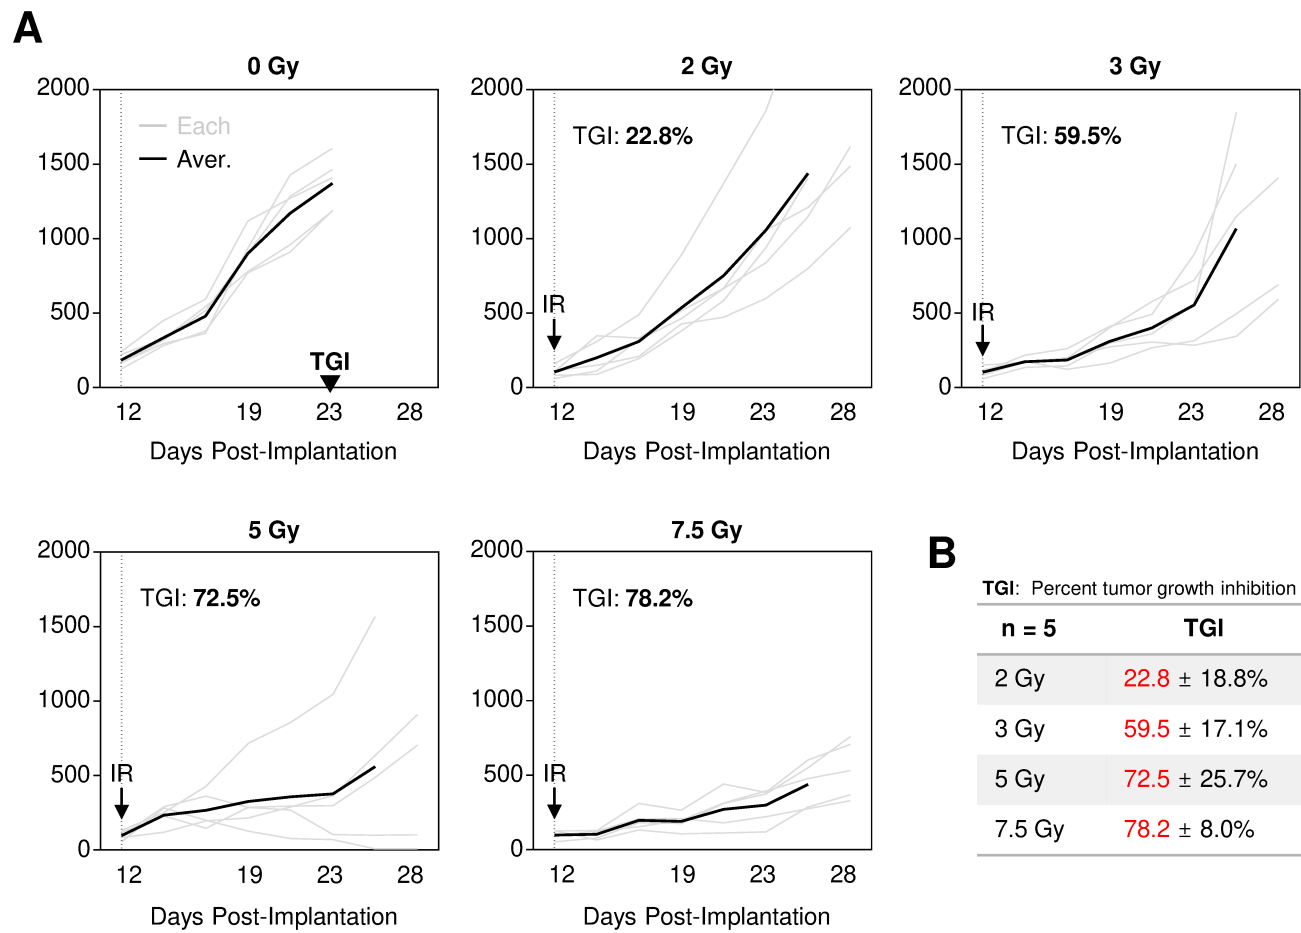

## Supplementary Figure 3.

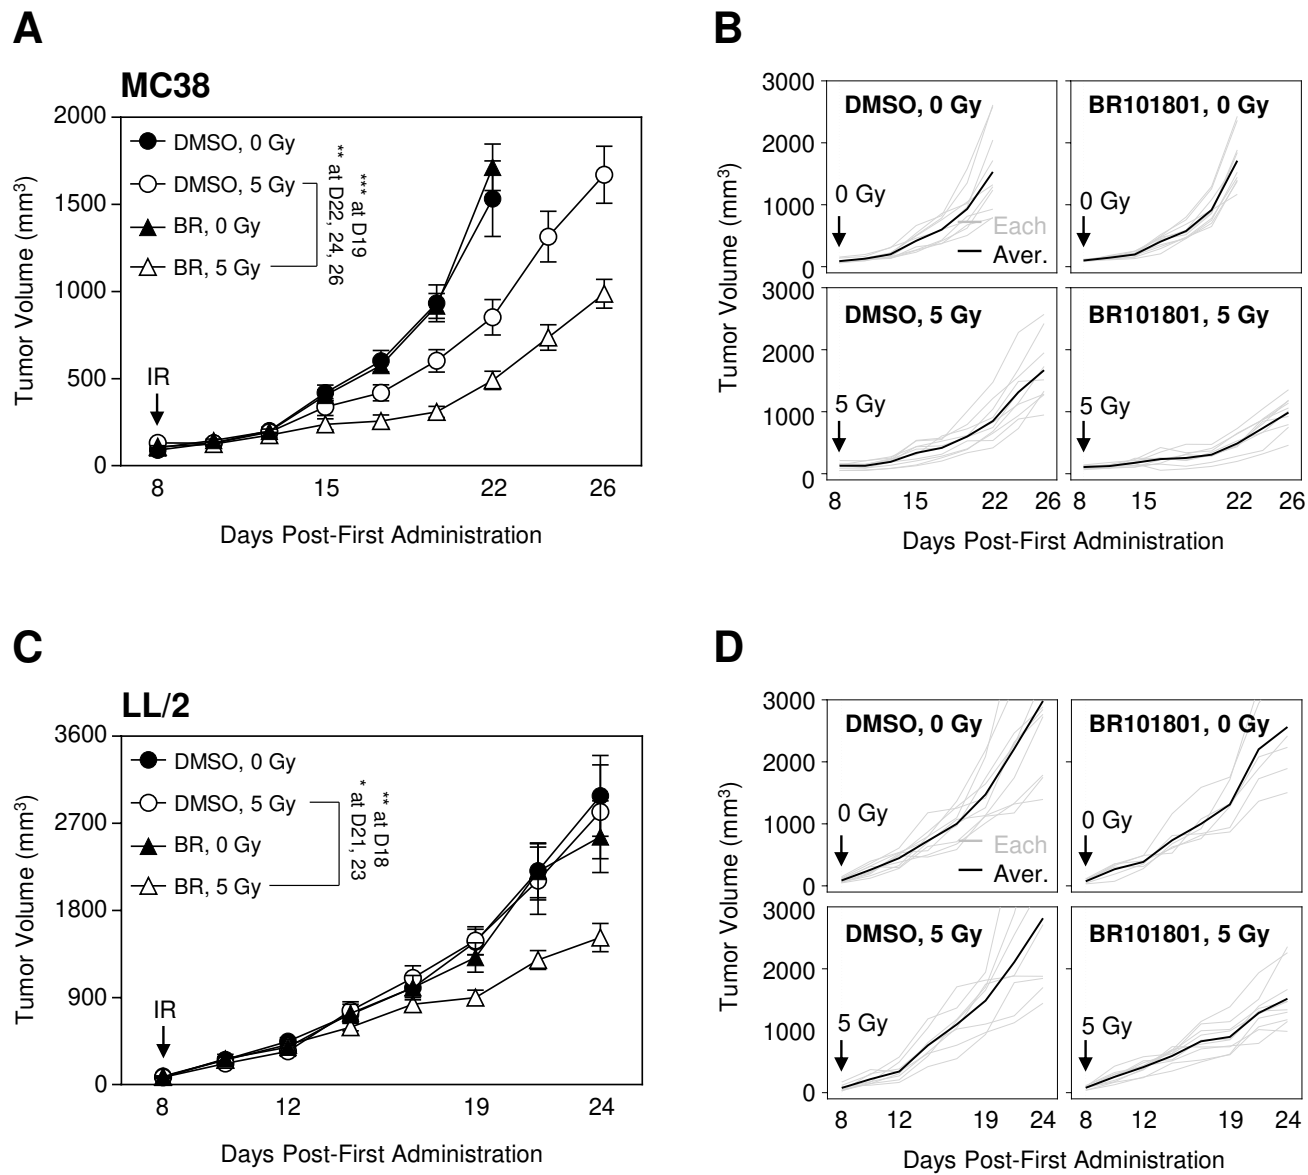

## Supplementary Figure 4.

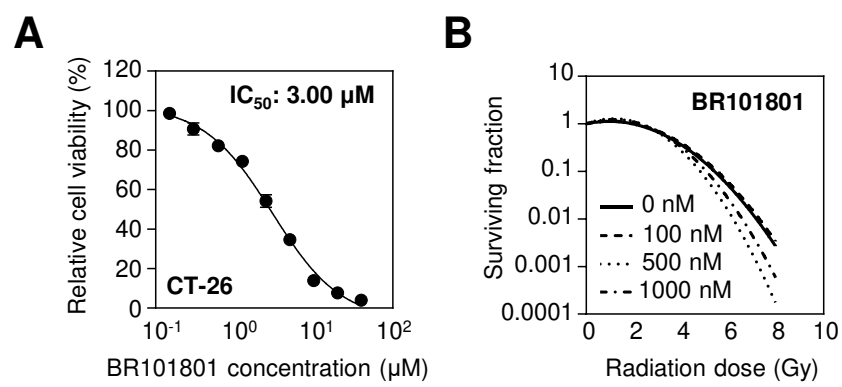

## Supplementary Figure 5.

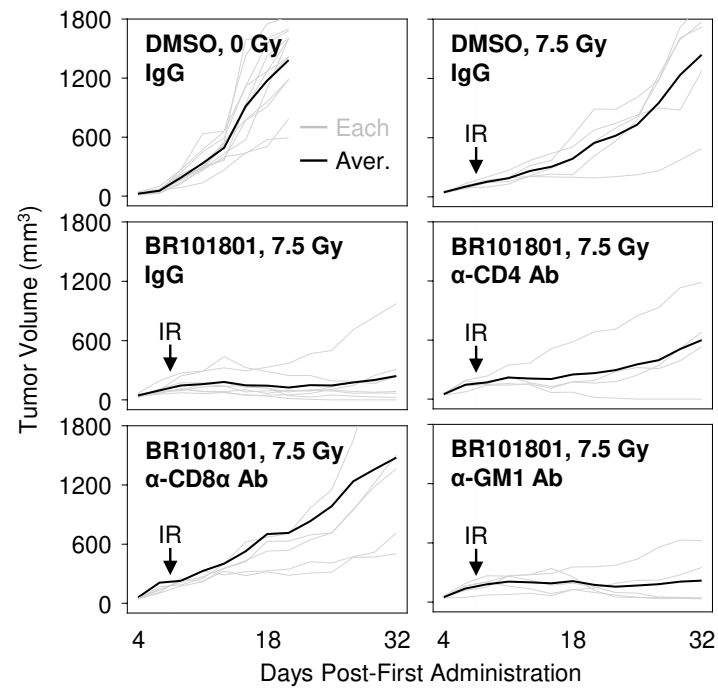

## Supplementary Figure 6.

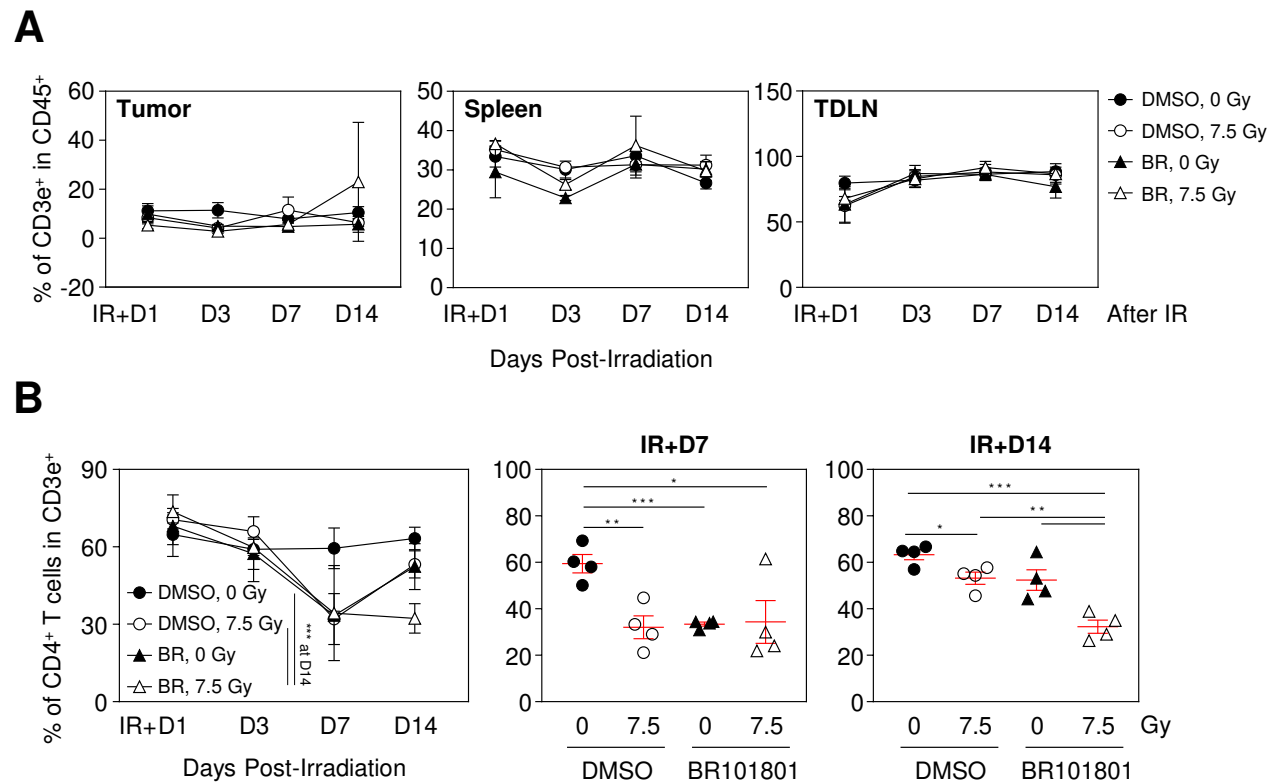

## Supplementary Figure 7.

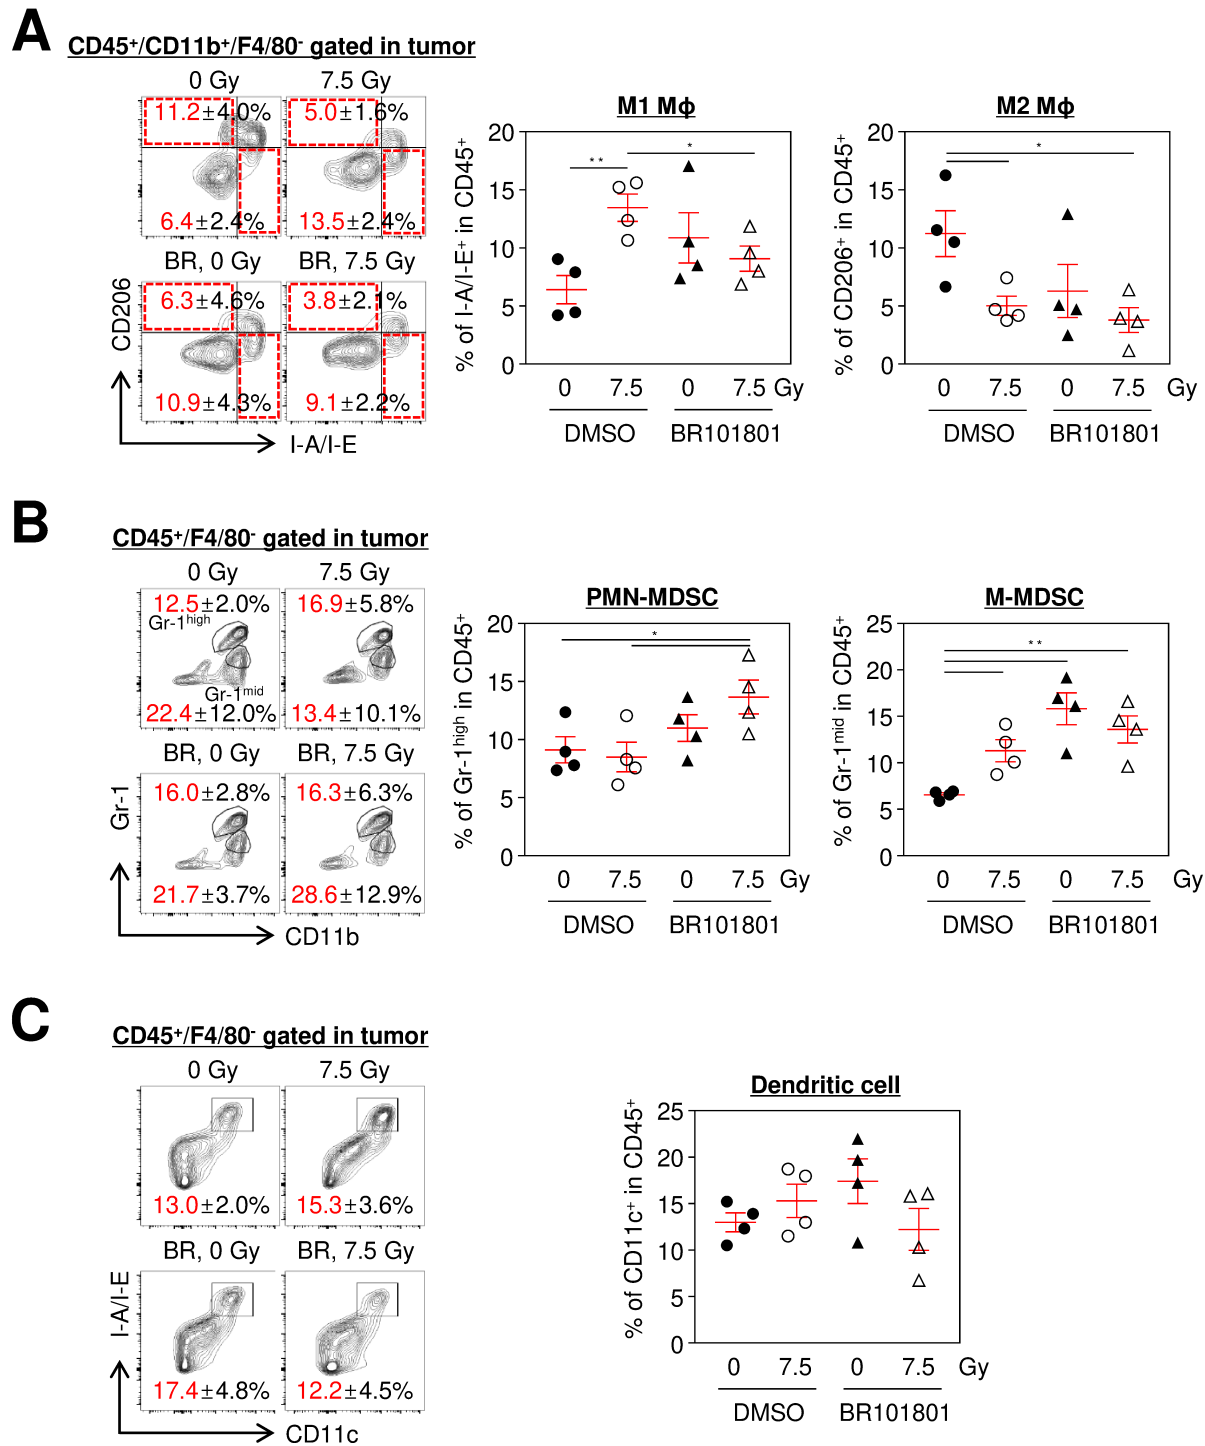

# Supplementary Figure 8.

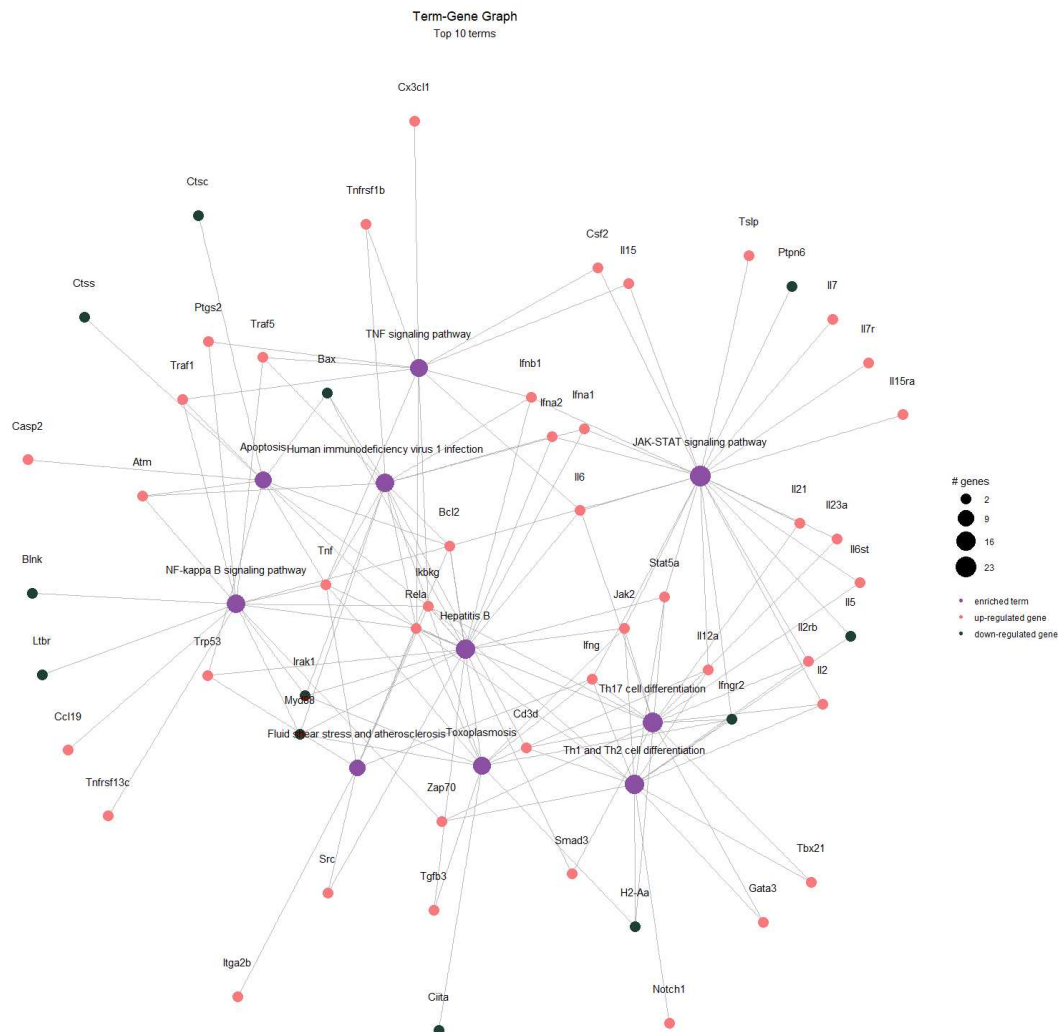



## Supplementary Figure 9.

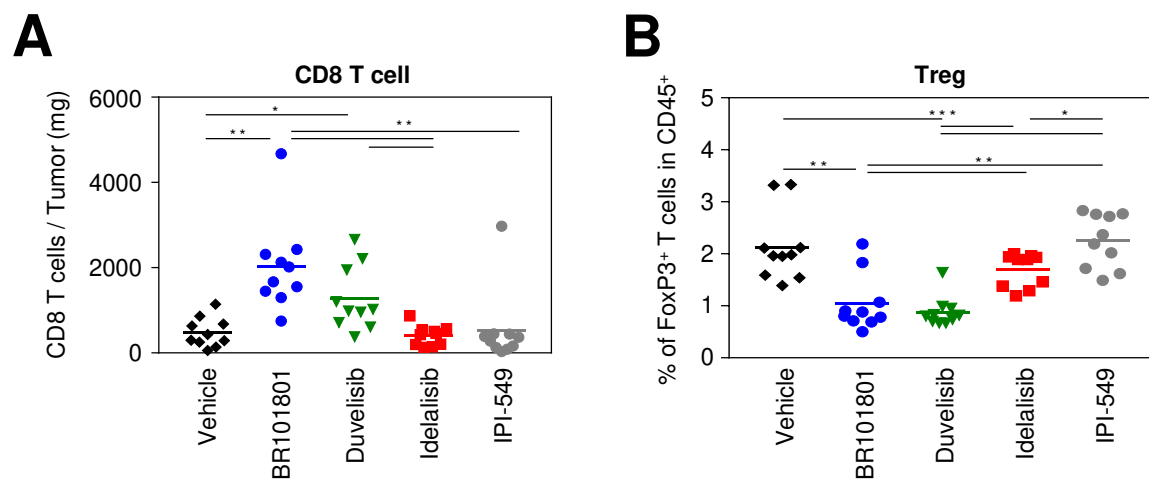

## Supplementary Figure 10.

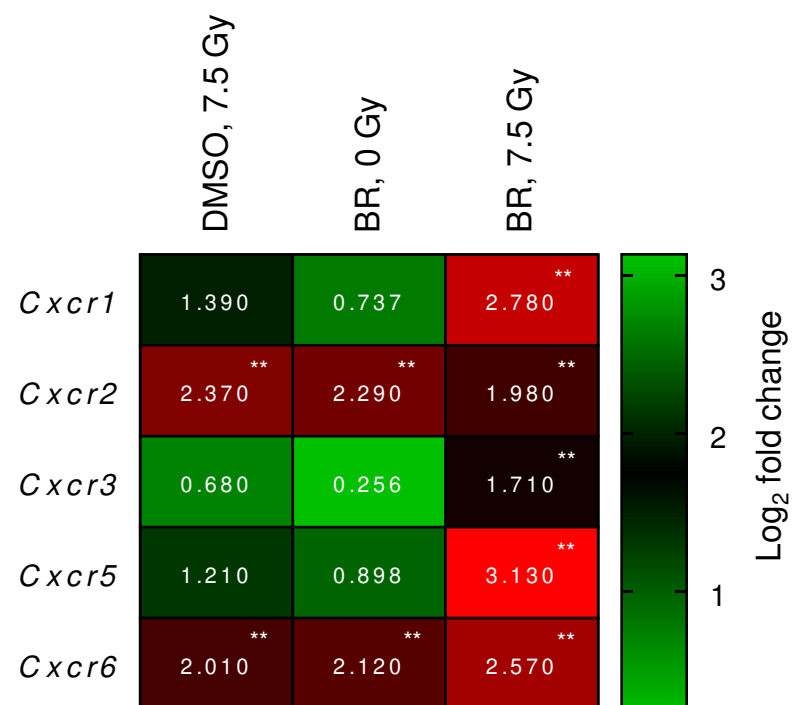

## Supplementary Figure 11.

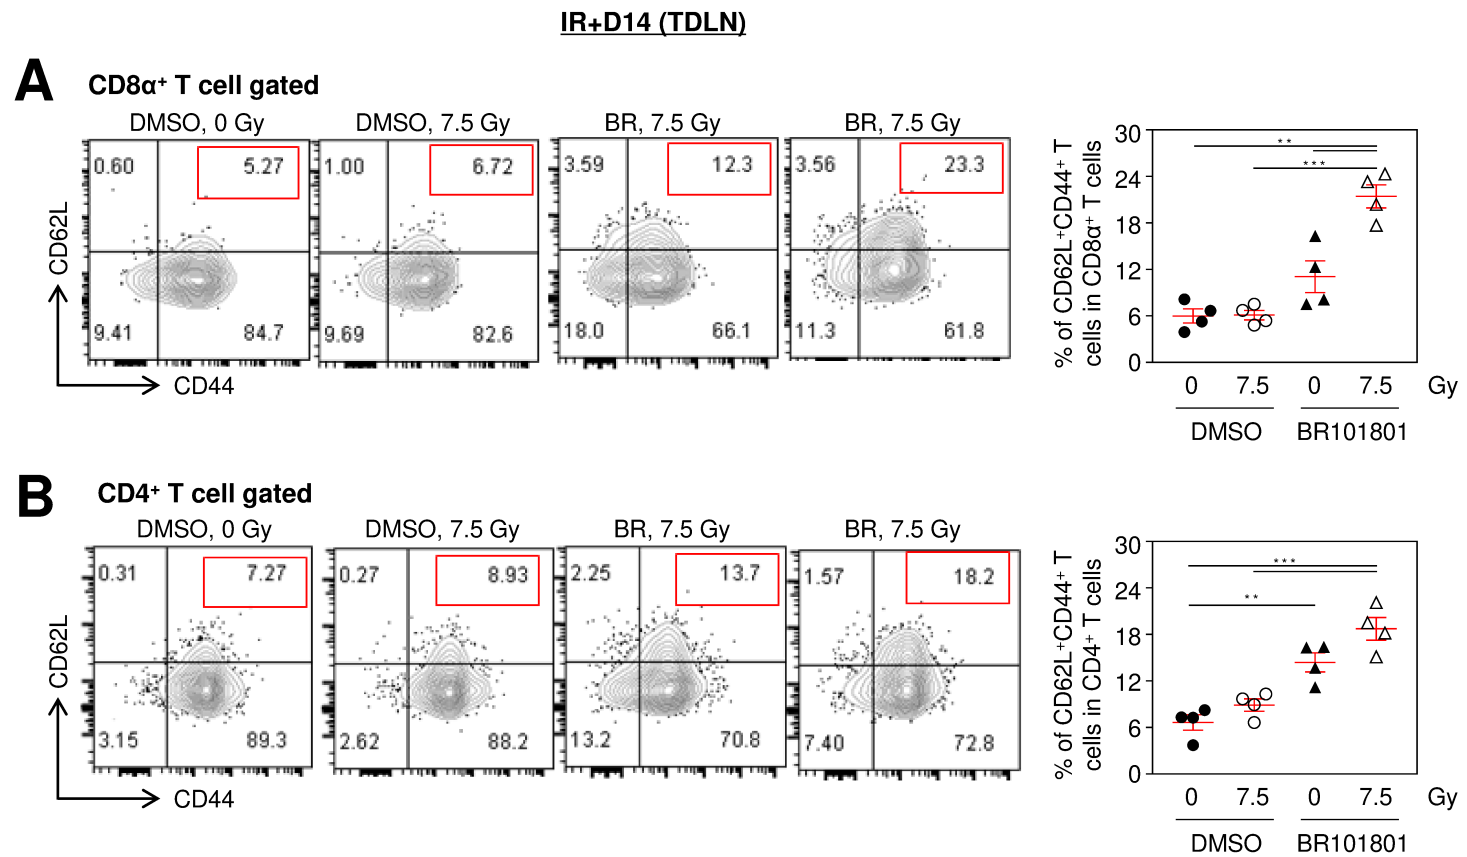

## Supplementary Table 1.

| Antibody                            | Fluorescence | Catalog No. | Clone       | Company    |
|-------------------------------------|--------------|-------------|-------------|------------|
| anti-CD3e                           | FITC         | 553062      | 145-2C11    | BD         |
| anti-CD4                            | PE           | 553652      | H129.19     | BD         |
| anti-CD8 $\alpha$                   | PerCP Cy5.5  | 551162      | 53-6.7      | BD         |
| anti-CD25                           | APC          | 101910      | 3C7         | BioLegend  |
| anti-PD-1                           | BV421        | 135217      | 29F.1A12    | BioLegend  |
| anti-CD45                           | BV510        | 563891      | 30-F11      | BD         |
| anti-CD11b                          | FITC         | 101206      | M1/70       | BioLegend  |
| anti-F4/80                          | PE           | 123110      | BM8         | BioLegend  |
| anti-Ly-6G/Ly-6C (Gr-1)             | PerCP Cy5.5  | 108425      | RB6-8C5     | BioLegend  |
| anti-CD206                          | PE-Cy7       | 141719      | C068C2      | BioLegend  |
| anti-I-A/I-E                        | APC          | 107613      | M5/114.15.2 | BioLegend  |
| anti-CD11c                          | BV421        | 117329      | N418        | BioLegend  |
| anti-CD62L                          | PE           | 104410      | MEL-14      | BioLegend  |
| anti-CD44                           | PerCP Cy5.5  | 45-0441-82  | IM7         | Invitrogen |
| anti-CD4                            | PE-Cy7       | 100421      | GK1.5       | BioLegend  |
| anti-CD3                            | PerCP Cy5.5  | 100218      | 17A2        | BioLegend  |
| anti-CD127                          | PE-cy7       | 25-1271-82  | A7R34       | Invitrogen |
| anti-CD8 $\alpha$                   | APC          | 100712      | 53-6.7      | BioLegend  |
| anti-CD8 $\alpha$                   | BV510        | 100752      | 53-6.7      | BioLegend  |
| anti-CD45                           | Alexa700     | 147716      | I3/2.3      | BioLegend  |
| anti-CD11b                          | APC-Cy7      | 101226      | M1/70       | BioLegend  |
| anti-Ly-6G/Ly-6C (Gr-1)             | BV510        | 108457      | RB6-8C5     | BioLegend  |
| H-2Ld MuLV gp70 Tetramer-SP SYVYHQF | APC          | TS M521-2   |             | MBL        |

**Supplementary Table 2.**

| <b>Antibody</b>    | <b>Fluorescence</b> | <b>Catalog No.</b> | <b>Clone</b> | <b>Company</b> |
|--------------------|---------------------|--------------------|--------------|----------------|
| anti-FoxP3         | PE-Cy7              | 25-5773-82         | FJK-16s      | Invitrogen     |
| anti-FoxP3         | APC                 | 17-5773-82         | FJK-16s      | Invitrogen     |
| anti-FoxP3         | BV421               | 126419             | MF-14        | BioLegend      |
| anti-IFN- $\gamma$ | BV510               | 505842             | XMG1.2       | BioLegend      |
| anti-Granzyme B    | BV421               | 396413             | QA18A28      | BioLegend      |

**Supplementary Table 3.**

| <b>Primer Name</b> | <b>Forward</b>             | <b>Reverse</b>                |
|--------------------|----------------------------|-------------------------------|
| <i>Gapdh</i>       | 5'-TGAGCAAGAGAGGCCCTATC-3' | 5'-AGGCCCTCCTGTTATTATG-3'     |
| <i>Cxcl9</i>       | 5'-ATCTTCCTGGAGCAGTGTGG-3' | 5'-AGTCCGGATCTAGGCAGGTT-3'    |
| <i>Cxcl10</i>      | 5'-GTGAGAATGAGGGCCATAGG-3' | 5'-GGCTAAACGCTTTCATTAAATTC-3' |
| <i>Cxcl11</i>      | 5'-AGGAAGGTCACAGCCATAGC-3' | 5'-CGATCTCTGCCATTTTGACG-3'    |
