# Supplementary material for: PI3Kδ/γ inhibitor BR101801 extrinsically potentiates effector CD8+ T cell-dependent antitumor immunity and abscopal effect after local irradiation
Source: PubMed Central journal article supplement — J Immunother Cancer. 2022 Mar 14;10(3):e003762. doi: 10.1136/jitc-2021-003762 (PMC8921929; doi:10.1136/jitc-2021-003762), 2022-03-14
Supplement: jitc-2021-003762supp002.pdf [file jitc-2021-003762supp002.pdf]

**PI3K $\delta/\gamma$  inhibitor BR101801 extrinsically potentiates effector CD8<sup>+</sup> T cell-dependent anti-tumor immunity and abscopal effect after local irradiation**

Yi Na Yoon<sup>1,5</sup>, Eunju Lee<sup>1,2,5</sup>, Young-Ju Kwon<sup>1,3</sup>, Jeong-An Gim<sup>4</sup>, Tae-Jin Kim<sup>1\*</sup>, and Jae-Sung Kim<sup>1,3\*</sup>

**Supplementary Figure 1. Characteristics of BR101801.** (A) Chemical structure of BR101801. The chemical name of BR101801 is 4-[[[(1S)-1-(4,8-Dichloro-1-oxo-2-phenyl-3-isoquinolyl)ethyl]amino]-8Hpyrido[2,3-d]pyrimidin-5-one with a molecular formula of C<sub>24</sub>H<sub>17</sub>Cl<sub>2</sub>N<sub>5</sub>O<sub>2</sub> and a molecular weight of 478.33 g/mol. (B) *In vitro* kinase assay of recombinant PI3K subtypes with BR101801.

**Supplementary Figure 2. Local irradiation inhibited tumor growth in a dose-dependent manner.**  $2 \times 10^5$  CT-26 cells were subcutaneously injected into the right flank of BALB/c mice. (A) Mean tumor volume following 2, 3, 5, and 7.5 Gy irradiation. (B) Percentages of tumor growth inhibition at each irradiation dose (n = 5 mice per group).

**Supplementary Figure 3. Synergistic anti-tumor effect of the combined therapy in MC38 and LL/2 syngeneic mice tumor models.** C57BL/6 mice bearing MC38 and LL/2 cells were orally administered (q.d.) 50 mg/kg BR101801 daily for 26 days and 24 days, respectively. The tumor mass was locally irradiated 8 days after the first dose of BR101801. (A) Mean tumor volume of subcutaneous (MC38) implants in BR101801 and irradiation treated mice (n = 10 mice per group). (B) Individual MC38 tumor growth curves (black line indicates the mean tumor volume in each group; gray line indicates individual tumor growth). (C) Mean tumor

volume of subcutaneous (LL/2) implants in BR101801 and irradiation treated mice ( $n \geq 6$  mice per group). (B) Individual LL/2 tumor growth curves (black line indicates the mean tumor volume in each group; gray line indicates individual tumor growth). \* $P < 0.05$ , \*\* $P < 0.01$ , \*\*\* $P < 0.001$  using an unpaired two-tailed  $t$ -test.

**Supplementary Figure 4. *In vitro* cytotoxicity assay of BR101801.** (A) BR101801 dose dependent cell viability in CT-26 cells. CT-26 cells were treated with 40  $\mu\text{M}$  to 0.625  $\mu\text{M}$  BR101801 for 72 h. Cell viability was determined using a WST-8 assay. (B) Survival fraction graphs of CT-26 cells. The data are representative of three independent experiments.

**Supplementary Figure 5. Antibody-mediated depletion of immune cells in BALB/c mice treated with BR101801 and/or irradiation.** BALB/c mice bearing CT-26 colon cancer were orally administrated (q.d.) with 50 mg/kg BR101801 daily for 32 days. Each mouse was intraperitoneally injected with 200  $\mu\text{g}$  anti-mouse CD4, CD8, or GM1 antibodies three days before irradiation and once a week ( $n \geq 4$  mice per group). Individual tumor growth curves of each group (the black line indicating the mean tumor volume of each group, the gray line indicating individual tumor growth).

**Supplementary Figure 6. Time-dependent tumor infiltrating lymphocytes.** BALB/c mice bearing CT-26 colon cancer were orally administrated (q.d.) with 50 mg/kg BR101801 daily till the sacrifice time point (Duration of BR101801 treatment; IR+1: for 9 days, IR+3: for 11 days, IR+7: for 15 days, IR+14: for 22 days). (A) Frequency of CD3e<sup>+</sup> in CD45<sup>+</sup> cells from day 1 to 14 after irradiation ( $n \geq 3$  mice per group). (B) Percentage of tumor-infiltrated CD4<sup>+</sup>

T cells from day 1 to 14 after irradiation ( $n \geq 3$  mice per group). All data are presented as mean  $\pm$  SEM. \* $P < 0.05$ , \*\* $P < 0.01$ , \*\*\* $P < 0.001$  using an unpaired two-tailed  $t$ -test.

**Supplementary Figure 7. Impact on the myeloid cell population induced by BR101801 and irradiation.** BALB/c mice bearing CT-26 colon cancer were orally administrated (q.d.) with 50 mg/kg BR101801 daily till the sacrifice (IR+7: for 15 days). Flow cytometry analysis was performed on day 7 post-irradiation of the tumor. (A) Representative contour plots of I-A/I-E/CD206 prior to gating with CD45<sup>+</sup>/CD11b<sup>+</sup>/F4/80<sup>+</sup> (left). The percentage of I-A/I-E<sup>+</sup>/CD206<sup>-</sup> M1-like macrophages (middle) and I-A/I-E<sup>-</sup>/CD206<sup>+</sup> M2-like macrophages (right) at day 7 after irradiation in the tumor. (B) Representative contour plots of Gr-1<sup>+</sup>/CD11b<sup>+</sup> cells gated with CD45<sup>+</sup>/F4/80<sup>-</sup> (left). The percentage of CD11b<sup>+</sup>/Gr-1<sup>high</sup> polymorphonuclear (PMN) MDSCs (middle) and CD11b<sup>+</sup>/Gr-1<sup>mid</sup> monocytic (M) MDSCs (right) at day 7 after irradiation in the tumor. (C) Representative contour plots of I-A/I-E<sup>+</sup>/CD11c<sup>+</sup> prior to gating with CD45<sup>+</sup>/F4/80<sup>-</sup> (left). The percentage of I-A/I-E<sup>+</sup>/CD11c<sup>+</sup> dendritic cells (right) at day 7 after irradiation in tumors ( $n = 4$  mice per group). All data are presented as mean  $\pm$  SEM. \* $P < 0.05$ , \*\* $P < 0.01$ , \*\*\* $P < 0.001$  using an unpaired two-tailed  $t$ -test.

**Supplementary Figure 8. Gene set enrichment map of NanoString data using a pathway-to-pathway network.** Size indicates the enrichment score of the gene set representing each pathway. The color indicates the up/down direction of regulation: pink, up-regulation; navy, downregulation. The gene copy number of CD45<sup>+</sup> cells from CT-26 tumor was analyzed using NanoString nCounter Immunology panel 7 days after irradiation ( $n = 3$  mice per group).

**Supplementary Figure 9. Impact of PI3K subunit blockade on T cell subsets.** Flow cytometry analysis was performed on day 7 post-irradiation of the CT-26 tumor. (A) The number of CD45<sup>+</sup>/CD3e<sup>+</sup>/CD4<sup>-</sup>/CD8α<sup>+</sup> cells. (B) The percentage of CD45<sup>+</sup>/CD3e<sup>+</sup>/CD4<sup>+</sup>/FoxP3<sup>+</sup> cells in CD45<sup>+</sup> cells (n = 10 mice per group). All data are presented as mean ± SEM. \**P* < 0.05, \*\**P* < 0.01, \*\*\**P* < 0.001 using an unpaired two-tailed *t*-test.

**Supplementary Figure 10. Heatmap analysis of *Cxcr* subunits.** Heatmap of mean fold-change in gene expressions of other treatment groups versus DMSO along group for genes that are differently expressed. The gene copy number of CD45<sup>+</sup> cells from CT-26 tumor was analyzed using NanoString nCounter Immunology panel 7 days after irradiation (n = 3 mice per group). \*\* indicates *P*-value (*P* < 0.01) using an unpaired two-tailed *t*-test.

**Supplementary Figure 11. Central memory T-cell (T<sub>CM</sub>) population in TDLN.** The percentage of tumor-infiltrated CD8α<sup>+</sup> and CD4<sup>+</sup> T cells with the CD44<sup>high</sup>/CD62L<sup>high</sup> phenotype at 14 days after irradiation (n = 4 mice per group). BALB/c mice bearing CT-26 colon cancer were orally administrated (q.d.) with 50 mg/kg BR101801 daily till the sacrifice (IR+14: for 22 days). All data are presented as mean ± SEM. \**P* < 0.05, \*\**P* < 0.01, \*\*\**P* < 0.001 using an unpaired two-tailed *t*-test.
